# Supplementary material
Source: ML conference proceedings conference paper supplement (https://openreview.net/forum?id=VoayJihXra)
Supplement: supplementary_material [file attachment]

# PDDL — The Planning Domain Definition Language

Version 1.2

This manual was produced by the AIPS-98 Planning Competition Committee:

Malik Ghallab, Ecole Nationale Supérieure D'ingénieur des  
Constructions Aéronautiques  
Adele Howe (Colorado State University)  
Craig Knoblock, ISI  
Drew McDermott (chair) (Yale University)  
Ashwin Ram (Georgia Tech University)  
Manuela Veloso (Carnegie Mellon University)  
Daniel Weld (University of Washington)  
David Wilkins (SRI)

It was based on the UCPOP language manual, written by the following  
researchers from the University of Washington:

Anthony Barrett, Dave Christianson, Marc Friedman, Chung Kwok,  
Keith Golden, Scott Penberthy, David E Smith, Ying Sun,  
& Daniel Weld

Contact Drew McDermott ([drew.mcdermott@yale.edu](mailto:drew.mcdermott@yale.edu)) with comments.

Yale Center for Computational Vision and Control  
Tech Report CVC TR-98-003/DCS TR-1165  
October, 1998

## Abstract

This manual describes the syntax of PDDL, the Planning Domain Definition Language, the problem-specification language for the AIPS-98 planning competition. The language has roughly the expressiveness of Pednault's ADL [10] for propositions, and roughly the expressiveness of UMCP [6] for actions. Our hope is to encourage empirical evaluation of planner performance, and development of standard sets of problems all in comparable notations.

# 1 Introduction

This manual describes the syntax, and, less formally, the semantics, of the Planning Domain Definition Language (PDDL). The language supports the following syntactic features:

- Basic STRIPS-style actions
- Conditional effects
- Universal quantification over dynamic universes (*i.e.*, object creation and destruction),
- Domain axioms over stratified theories,
- Specification of safety constraints.
- Specification of hierarchical actions composed of subactions and subgoals.
- Management of multiple problems in multiple domains using differing subsets of language features (to support sharing of domains across different planners that handle varying levels of expressiveness).

PDDL is intended to express the “physics” of a domain, that is, what predicates there are, what actions are possible, what the structure of compound actions is, and what the effects of actions are. Most planners require in addition some kind of “advice,” that is, annotations about which actions to use in attaining which goals, or in carrying out which compound actions, under which circumstances. We have endeavored to provide no advice at all as part of the PDDL notation; that explains the almost perverse aura of neutrality surrounding the notation at various places. As a result of this neutrality, almost all planners will require extending the notation, but every planner will want to extend it in different ways.

Even with advice left out, we anticipate that few planners will handle the entire PDDL language. Hence we have factored the language into subsets of features, called *requirements*. Every domain defined using PDDL should declare which requirements it assumes. A planner that does not handle a given requirement can then skip over all definitions connected with a domain that declares that requirement, and won’t even have to cope with its syntax.

PDDL is descended from several forebears:

- ADL [10]
- The SIPE-2 formalism [12]
- The Prodigy-4.0 formalism [3]
- The UMCP formalism [6]
- The Unpop formalism [8]
- and, most directly, the UCPOP formalism [2]

Our hope is to encourage sharing of problems and algorithms, as well as to allow meaningful comparison of the performance of planners on different problems. A particular goal is to provide a notation for problems to be used in the AIPS-98 planning contest.

## 2 A Simple Example

To give a flavor of the language, consider Pednault’s famous example [9] involving transportation of objects between home and work using a briefcase whose effects involve both universal quantification (*all* objects are moved) and conditional effects (*if* they are inside the briefcase when it is moved). The domain is described in terms of three action schemata (shown below). We encapsulate these schemata by defining the domain and listing its requirements.

```
(define (domain briefcase-world)
  (:requirements :strips :equality :typing :conditional-effects)
  (:types location physob)
  (:constants (B - physob))
  (:predicates (at ?x - physob ?l - location)
               (in ?x ?y - physob))
  ...)
```

A domain’s set of requirements allow a planner to quickly tell if it is likely to be able to handle the domain. For example, this version of the briefcase world requires conditional effects, so a straight STRIPS-representation planner would not be able to handle it. A keyword (symbol starting with a colon) used in a `:requirements` field is called a *requirement flag*; the domain is said to *declare a requirement for* that flag.

All domains include a few built-in types, such as `object` (any object), and `number`. Most domains define further types, such as `location` and `physob` (“physical object”) in this domain.

A constant is a symbol that will have the same meaning in all problems in this domain. In this case `B` — the briefcase — is such a constant. (Although we could have a type `briefcase`, we don’t need it, because there’s only one briefcase.)

Inside the scope of a domain declaration, one specifies the action schemata for the domain.

```
(:action mov-b
  :parameters (?m ?l - location)
  :precondition (and (at B ?m) (not (= ?m ?l)))
  :effect (and (at b ?l) (not (at B ?m))
              (forall (?z)
                (when (and (in ?z) (not (= ?z B)))
                  (and (at ?z ?l) (not (at ?z ?m))))))) )
```

This specifies that the briefcase can be moved from location `?m` to location `?l`, where the symbols starting with question marks denote variables. The preconditions dictate that the briefcase must initially be in the starting location for the action to be legal and that it is illegal to try to move the briefcase to the place where it is initially. The effect equation says that the briefcase moves to its destination, is no longer where it started, and everything inside the briefcase is likewise moved.

```
(:action put-in
  :parameters (?x - physob ?l - location)
  :precondition (not (= ?x B))
  :effect (when (and (at ?x ?l) (at B ?l))
            (in ?x)) )
```

This action definition specifies the effect of putting something (not the briefcase (B) itself!) inside the briefcase. If the action is attempted when the object is not at the same place (?l) as the briefcase, then there is no effect.

```
(:action take-out)
  :parameters (?x - physob)
  :precondition (not (= ?x B))
  :effect (not (in ?x)) )
```

The final action provides a way to remove something from the briefcase.

Pednault's example problem supposed that at home one had a dictionary and a briefcase with a paycheck inside it. Furthermore, suppose that we wished to have the dictionary and briefcase at work, but wanted to keep the paycheck at home. We can specify the planning problem as follows:

```
(define (problem get-paid)
  (:domain briefcase-world)
  (:init (place home) (place office)
         (object p) (object d) (object b)
         (at B home) (at P home) (at D home) (in P))
  (:goal (and (at B office) (at D office) (at P home))))
```

One could then invoke a planner by typing something like `(graph-plan 'get-paid)`. The planner checks to see if it can handle the domain requirements and if so, plans.

### 3 Syntactic Notation

Our notation is an Extended BNF (EBNF) with the following conventions:

- Each rule is of the form *<syntactic element> ::= expansion*.
- Angle brackets delimit names of syntactic elements.
- Square brackets ([ and ]) surround optional material. When a square bracket has a superscripted requirement flag, such as:

[(:types ...)]<sup>(:typing)</sup>

it means that the material is includable only if the domain being defined has declared a requirement for that flag. See Section 15.

- Similarly, the symbol `::=` may be superscripted with a requirement flag, indicating that the expansion is possible only if the domain has declared that flag.
- An asterisk (\*) means “zero or more of”; a plus (+) means “one or more of.”
- Some syntactic elements are parameterized. E.g., `<list (symbol)>` might denote a list of symbols, where there is an EBNF definition for `<list x>` and a definition for `<symbol>`. The former might look like

`<list x> ::= (x*)`

so that a list of symbols is just `(<symbol>*)`.

- Ordinary parenthesis are an essential part of the syntax we are defining and have no semantics in the EBNF meta language.

As we said in Section 1, PDDL is intended to express only the physics of a domain, and will require extension to represent the search-control advice that most planners need. We recommend that all such extensions obey the following convention: An extended PDDL expression is an ordinary PDDL expression with some subexpressions of the form  $(\uparrow\uparrow e\ a)$ , where  $e$  is an unextended PDDL expression and  $a$  is some advice. The “ $\uparrow\uparrow$ ” notation indicates that we are ascending to a “meta” level. The word “expression” here is interpreted as “any part of a PDDL expression that is either a single symbol or an expression of the form  $(\dots)$ .” For instance, the definition of `mov-b` given above might be enhanced for a particular planner thus:

```
(:action mov-b
  :parameters (?m ?l - location)
  :precondition (and (^ (at B ?m)
                        (goal-type: achievable))
                 (^ (not (= ?m ?l))
                    (goal-type: filter)))
  :effect (and (at b ?l) (not (at B ?m))
               (forall (?z)
                 (when (and (in ?z) (not (= ?z B)))
                   (and (^ (at ?z ?l) :primary-effect)
                        (^ (not (at ?z ?m)) :side-effect))))))
```

to indicate that

1. (`:primary-effect` vs. `:side-effect`): when the planner encounters a goal of the form `(at ?z ?l)`, it may introduce a `mov-b` action into a plan in order to achieve that goal, but a goal of the form `(not (at ?z ?m))`, while it may be achieved by an action of this form introduced for another reason, should not cause a `mov-b` action to be created;
2. (different `goal-types`): If an action such as `(mov-b b1 place2 place2)` arises, it should be rejected immediately, rather than giving rise to a subgoal `(not (= place2 place2))`.

Adopting this convention should improve the portability of plan-problem collections, because a planner using PDDL can be written to ignore all advice in unexpected contexts. In the future, we may introduce a more complex syntax for attaching advice to be used by different planners, but for now the only general principle is that an expression of the form ( $\uparrow \uparrow e a$ ) can occur anywhere, and will mean exactly the same thing as  $e$ , as far as domain physics are concerned.

Comments in PDDL begin with a semicolon (“;”) and end with the next newline. Any such string behaves like a single space.

## 4 Domains

We now describe the language more formally. The EBNF for defining a domain structure is:

```

<domain>                ::= (define (domain <name>)
                             [<extension-def>]
                             [<require-def>]
                             [<types-def>]:typing
                             [<constants-def>]
                             [<domain-vars-def>]:expression-evaluation
                             [<predicates-def>]
                             [<timeless-def>]
                             [<safety-def>]:safety-constraints
                             <structure-def>*)

<extension-def>         ::= (:extends <domain name>+)
<require-def>           ::= (:requirements <require-key>+)
<require-key>           ::= See Section 15
<types-def>             ::= (:types <typed list (name)>)
<constants-def>         ::= (:constants <typed list (name)>)
<domain-vars-def>       ::= (:domain-variables
                             <typed list(domain-var-declaration)>)
<predicates-def>        ::= (:predicates <atomic formula skeleton>+)
<atomic formula skeleton>
                             ::= (<predicate> <typed list (variable)>)
<predicate>             ::= <name>
<variable>              ::= ?<name>
<timeless-def>          ::= (:timeless <literal (name)>+)
<structure-def>         ::= <action-def>
<structure-def>         ::= :domain-axioms <axiom-def>
<structure-def>         ::= :action-expansions <method-def>

```

Although we have indicated the arguments in a particular order, they may come in any order, except for the (domain ...) itself.

*Proviso:* For the convenience of some implementers, we define a “strict subset” of PDDL that imposes the following additional restrictions:

1. All keyword arguments (for `(define (domain ...))` and all similar constructs) must appear in the order specified in the manual. (An argument may be omitted.)
2. Just one PDDL definition (of a domain, problem, etc.) may appear per file.
3. Addenda (see Section 11) are forbidden.

Names of domains, like other occurrences of syntactic category `<name>`, are strings of characters beginning with a letter and containing letters, digits, hyphens (“-”), and underscores (“\_”). Case is not significant.

If the `:extends` argument is present, then this domain inherits requirements, types, constants, actions, axioms, and timelessly true propositions from the named domains, which are called the *ancestors* of this domain.

The `:requirements` field is intended to formalize the fact that not all planners can handle all problems statable in the PDDL notation. If the requirement is missing (and not inherited from any ancestor domain), then it defaults to `:strips`. In general, a domain is taken to declare every requirement that any ancestor declares. A description of all possible requirements is found in Section 15.

The `:types` argument uses a syntax borrowed from Nisp [7] that is used elsewhere in PDDL (but only if `:typing` is handled by the planner).

```

<typed list (x)> ::= x*
<typed list (x)> ::= :typing x+- <type> <typed list(x)>
<type>          ::= <name>
<type>          ::= (either <type>+)
<type>          ::= :fluents (fluent <type>)

```

A typed list is used to declare the types of a list of entities; the types are preceded by a minus sign (“-”), and every other element of the list is declared to be of the first type that follows it, or `object` if there are no types that follow it. An example of a `<typed list(name)>` is

```
integer float - number physob
```

If this occurs as a `:types` argument to a domain, it declares three new types, `integer`, `float`, and `physob`. The first two are subclasses of `number`, the last a subclass of `object` (by default). That is, every integer is a number, every float is a number, and every physical object is an object.

An atomic type name is just a timeless unary predicate, and may be used wherever such a predicate makes sense. In addition to atomic type names, there are two compound types. `(either  $t_1 \dots t_k$ )` is the union of types  $t_1$  to  $t_k$ . `(fluent  $t$ )` is the type of an object whose value varies from situation to situation, and is always of type  $t$ . (See Section 12.)

The `:domain-variables` declaration is used for domains that declare the requirement flag `:expression-evaluation`; this requirement, and the accompanying syntactic class `domain-var-declaration`, are described in Section 12.

The `:constants` field has the same syntax as the `:types` field, but the semantics is different. Now the names are taken as new constants in this domain, whose types are given as described above. E.g., the declaration

```
(:constants sahara - theater
      division1 division2 - division)
```

indicates that in this domain there are three distinguished constants, **sahara** denoting a **theater** and two symbols denoting **divisions**.

The **:predicates** field consists of a list of declarations of predicates, once again using the typed-list syntax to declare the arguments of each one.

The **:timeless** field consists of a list of literals that are taken to be true at all times in this domain. The syntax **<literal(name)>** will be defined in Section 6. It goes without saying that the predicates used in the timeless propositions must be declared either here or in an ancestor domain. (Built-in predicates such as “=” behave as if they were inherited from an ancestor domain, although whether they actually are implemented this way depends on the implementation.)

The remaining fields define actions and rules in the domain, and will be given their own sections.

## 5 Actions

The EBNF for an action definition is:

```
<action-def>      ::= (:action <action functor>
                        :parameters ( <typed list (variable)> )
                        <action-def body>)
```

```
<action functor> ::= <name>
```

```
<action-def body> ::= [:vars (<typed list(variable)>)] :existential-preconditions
                    [:precondition <GD>] :conditional-effects
                    [:expansion
                     <action spec>]:action-expansions
                    [:expansion :methods]:action-expansions
                    [:maintain <GD>]:action-expansions
                    [ :effect <effect>]
                    [:only-in-expansions <boolean>]:action-expansions
```

The **:parameters** list is simply the list of variables on which the particular rule operates, *i.e.*, its arguments, using the typing syntax described above. The **:vars** list are locally bound variables whose semantics are explained below.

The **:precondition** is an optional goal description (GD) that must be satisfied before the action is applied. As defined below (Section 6), PDDL goal descriptions are quite expressive: an arbitrary function-free first-order logical sentence is allowed. If no preconditions are specified, then the action is always executable. *Effects* list the changes which the action imposes on the current state of the world. Effects may be universally quantified and conditional, but full first order sentences (*e.g.*, disjunction and Skolem functions) are not allowed. Thus, it is important to realize that PDDL is asymmetric: action preconditions are considerably more expressive than action effects.



The **:effect** describes the effects of the action. See Section 7.

If the domain declares requirement **:action-expansions**, then it is legitimate to include an **:expansion** field for an action, which specifies all the ways the action may be carried out in terms of (presumably simpler) actions. It is also meaningful to impose a constraint that a <GD> be maintained throughout the execution of an action. See Section 8.

An action definition must have an **:effect** or an **:expansion**, but *not both*.

Free variables are not allowed. All variables in an action definition (*i.e.*, in its preconditions, maintenance condition, expansion, or effects) must be included in the **:parameter** or **:vars** list, or explicitly introduced with a quantifier.

**:vars** is mainly a convenience. Variables appearing here behave as if bound existentially in preconditions and universally in effects, except that it is an error if more than one instance satisfies the existential precondition. So, for example, in the following definition

```
(:action spray-paint
  :parameters (?c - color)
  :vars (?x - location)
  :precondition (at robot ?x)
  :effect (forall (?y - physob)
            (when (at ?y ?x)
                  (color ?y ?c))))
```

if the robot must be in at most one place to avoid an error.

All the variables occurring free in the **:effect** or **:action** field must be bound in the **:precondition** field.

The optional argument **:only-in-expansions** is described in Section 8.

## 6 Goal Descriptions

A goal description is used to specify the desired goals in a planning problem and also the preconditions for an action. Function-free first-order predicate logic (including nested quantifiers) is allowed.

```
<GD> ::= <atomic formula(term)>
<GD> ::= (and <GD>*)
<GD> ::= <literal(term)>
<GD> ::= :disjunctive-preconditions (or <GD>*)
<GD> ::= :disjunctive-preconditions (not <GD>)
<GD> ::= :disjunctive-preconditions (imply <GD> <GD>)
<GD> ::= :existential-preconditions
        (exists (<typed list(variable)>*) <GD> )
<GD> ::= :universal-preconditions
        (forall (<typed list(variable)>*) <GD> )
<literal(t)> ::= <atomic formula(t)>
<literal(t)> ::= (not <atomic formula(t)>)
<atomic formula(t)> ::= (<predicate> t*)
<term> ::= <name>
```

`<term> ::= <variable>`

where, of course, an occurrence of a `<predicate>` should agree with its declaration in terms of number and, when applicable, types of arguments.

Hopefully the semantics of these expressions is obvious.

## 7 Effects

PDDL allows both conditional and universally quantified effects. The description is straightforward:

```

<effect>      ::= (and <effect>*)
<effect>      ::= (not <atomic formula(term)>)
<effect>      ::= <atomic formula(term)>
<effect>      ::= :conditional-effects (forall (<variable>*) <effect>)
<effect>      ::= :conditional-effects (when <GD> <effect>)
<effect>      ::= :fluents (change <fluent> <expression>)

```

We assume that all variables must be bound (either with a quantifier or in the parameters section of an action definition).

As in STRIPS, the truth value of predicates are assumed to persist forward in time. Unlike STRIPS, PDDL has no delete list — instead of deleting (`on a b`) one simply asserts (`not (on a b)`). If an action's effects does not mention a predicate  $P$  then the truth of that predicate is assumed unchanged by an instance of the action.

The semantics of (`when  $P$   $E$` ) are as follows: If  $P$  is true before the action, then effect  $E$  occurs after.  $P$  is a *secondary precondition* [10]. The action is feasible even if  $P$  is false, but the effect  $E$  occurs only if  $P$  is true.

Fluents are explained in Section 12.

## 8 Action Expansions

In many classical *hierarchical* planners (such as Sipe [12], O-Plan [5], and UMCP [6]) goals are specified in terms of abstract actions to carry out as well as (or instead of) goals to achieve. A solution to a planning problems is a sequence of actions that jointly compose all the abstract actions originally requested. PDDL allows for this style of planning by providing an `:expansion` field in action definitions, provided the domain declares requirement `:action-expansions`. The field, as described above, is of the form `:expansion <action spec>`, where `<action spec>` has the following syntax:

```

<action spec> ::= <action-term>
<action spec> ::= (in-context <action spec>
                  <action-def body>)
<action spec> ::= (choice <action spec>*)
<action spec> ::= (forsome (<typed list(variable)>*)
                  <action spec>)

```

```

<action spec>      ::= (series <action spec>*)
<action spec>      ::= (parallel <action spec>*)
<action spec>      ::= (tag <action-label term>*
                        <action spec>
                        <action-label term>*)
<action spec>      ::= :foreach-expansions
                        (foreach <typed list(variable)>
                          <GD> <action spec>)
<action spec>      ::= :dag-expansions
                        (constrained (<action spec>+)
                          <action constraint>*)
<action constraint> ::= (in-context <action constraint>
                        <action-def body>)
<action constraint> ::= (series <action constraint>*)
<action constraint> ::= (parallel <action constraint>*)
<action-term>       ::= (<action functor> <term>*)
<action-label term> ::= <action label>
                        | (< <action label>)
                        | (> <action label>)
<action label>      ::= <name>

```

Extra choices may be added to an action expansion after the action is defined, by the use of `:methods`, as described in Section 11. An action with no expansion is called a *primitive action*, or just a *primitive*. It is always possible to tell by the action definition if the action is primitive; if all its expansions are defined via methods, then the `:expansion` argument should be the symbol `:methods`.

An action may be expanded into a structure of actions, either a series-parallel combination, or, if the domain declares requirement `:dag-expansions` an arbitrary partial order (with steps labeled by `tag`). If there is a choice of expansions, it is indicated using `choice`. A `forsome` behaves like a choice among all its instances.

The only built-in action term is `(--)`, or *no-op*.

Anywhere an action is allowed, the expansion may have an expression of the form

```

(in-context <action spec>
  :precondition P
  :maintain M)

```

This construct is used to declare preconditions and maintenance conditions of actions that are due purely to their occurring in the context of this expansion. (It should *not* be used to repeat the preconditions associated with the definition of the action itself.) For example, to indicate a plan to evacuate an area of friendly forces and then shell it, one might write

```

(series (clear ?area)
  (in-context (shell ?area)
    :precondition (not (exists (?x - unit)
      (and (friendly ?x) (in ?x ?area))))))

```

As syntactic sugar, PDDL allows you to write `(achieve  $P$ )` as an abbreviation for `(in-context (--) :precondition  $P$ )`.

The `(constrained  $A$   $C^*$ )` syntax allows fairly arbitrary further conditions to be imposed on an action spec, with labels standing in for actions and their endpoints. The labels are defined by the `(tag  $labels$   $action$ )` construct. A label stands for the whole action (occurrence) unless it is qualified by `<` or `>`, in which case it stands for the beginning or end of the action. Inside  $C$ , `(series  $l_1$   $l_2$  ...  $l_k$ )` imposes an additional ordering requirement on the time points tagged  $l_1, \dots, l_k$ . `(in-context (series  $l_1$  ...  $l_k$ ) -conditions-)` can be used to impose extra conditions (or announce extra effects) of the interval corresponding to such an additional ordering.

For example, to expand an action into four subactions (A), (B), (C), and (D), such that (A) precedes (B) and (D), and (C) precedes (D), with condition (P) maintained from the end of (A) until the end of (D), write

```
:expansion (constrained ((series (tag A (> end-a)) (B))
                          (series (C) (tag (< beg-d) (D) (> end-d))))
            (in-context (series end-a beg-d end-d)
                        :maintain (P)))
```

As an illustration of all this, here is a fragment of the University of Maryland Translog domain [1], specifying how to unload a flatbed truck:

```
(:action unload
  :parameters (?p - package ?v - vehicle ?l - location)
  :expansion
    (choice
      ... ; several choices elided
      (forsome (?c - crane)
        (in-context
          (constrained
            (series (tag (pick-up-package-vehicle
                          ?p ?c ?v ?l)
                        (> end-n1))
                    (tag (< beg-n2)
                        (put-down-package-ground
                          ?p ?c ?l))))
          (in-context (series end-n1 beg-n2)
            :maintain (and (at-package ?p ?c)
                          (at-equipment ?c ?l))))
        :precondition (and (flatbed ?v)
                          (empty ?c)
                          (at-package ?p ?v)
                          (at-vehicle ?v ?l)
                          (at-equipment ?c ?l))))))
```

Note that PDDL does not allow you to specify whether it *makes sense* to insert steps to achieve an in-context precondition of a choice (as opposed to using it as a “filter” condition). That falls into the category of advice, which is handled in a planner-specific way.

The `parallel` construct imposes no constraints on the execution order of its arguments. However, a label associated with a parallel composition is associated with the first action of the composition to begin, in the case of a “<” label, or the last action to end, in the case of a “>.” E.g., to indicate that a condition be true from the end of `act1` until a set of actions performed in parallel with `act1` are finished, write

```
(constrained (tag (parallel (tag (act1) (> end-act1))
                             (act2)
                             ...
                             (actN))
              (> alldone))
  (in-context (series end-act1 alldone)
    :maintain (condition)))
```

If the domain declares requirement `:foreach-expansions`, then an action can have an expansion of the form `(foreach (v) P(v) A(v))`, where  $v$  is a set of typed variables,  $P(v)$  is a precondition, and  $A(v)$  is an action spec. The idea is to expand the action into zero or more occurrences of  $A(v)$ , one for each instance of  $P(v)$  that is true before in the situation when the expanded action begins execution. (See Appendix A for a precise definition of what it means for an action-spec to be satisfied by an action sequence.)

The syntax of the language permits labels to occur inside `choice` and `foreach` action specs. It is a consequence of the formal semantics of Appendix A that (a) a constraint mentioning a label inside a `choice` branch that doesn’t occur doesn’t constrain anything; (b) a constraint mentioning a reference to a label inside a `foreach` or `forsome` from outside doesn’t constrain anything.

In Section 5 we mentioned that an action definition may contain an argument

```
:only-in-expansions.
```

If this is `t` (default is `nil`), then a planner is not allowed to assume that instances of the action are feasible if its preconditions are satisfied. Instead, it can include an action in a plan only if it occurs as the expansion of some other action. The intended use of this notation is to indicate that we do not really know all the preconditions of the action, just some standard contexts in which the preconditions are sure to be satisfied.

See Section 11 for a notation that allows cumbersome action expansions to be broken into more manageable pieces.

## 9 Axioms

Axioms are logical formulas that assert relationships among propositions that hold within a situation (as opposed to action definitions, which define relationships across successive situations). To have axioms, a domain must declare requirement `:domain-axioms`.

```

<axiom-def> ::= (:axiom <GD>)
                :vars (<typed list (variable)>)
                :context <GD>
                :implies <literal(term)>)

```

The `:vars` field behaves like a universal quantifier. All the variables that occur in the axiom must be declared here.

For example, we might define the classical blocks-world predicates `above` and `clear` as follows:

```

(:axiom
  :vars (?x ?y - physob)
  :context (on ?x ?y)
  :implies (above ?x ?y))

(:axiom
  :vars (?x ?y - physob)
  :context (exists (?z - physob)
             (and (on ?x ?z) (above ?z ?y)))
  :implies (above ?x ?y))

(:axiom
  :vars (?x - physob)
  :context (or (= ?x Table)
              (not (exists (?b - block)
                           (on ?b ?x))))
  :implies (clear ?x))

```

Unless a domain declares requirement `:true-negation`, `not` is treated using the technique of “negation as failure” [4]. That means it makes no sense to *conclude* a negated formula; they should occur only as deductive goals, when `(not g)` succeeds if and only if *g* fails. (If *g* contains variables, the results are undefined.) Hence axioms are treated directionally, always used to conclude the `:implies` field, and never to conclude a formula from the `:context` field. (Of course, whether an axiom is used forward or backward is a matter of advice, and PDDL is silent on this issue.)

Another important reason for the directionality of axioms is to avoid overly complex interactions with action definitions. The rule is that action definitions are not allowed to have effects that mention predicates that occur in the `:implies` field of an axiom. The intention is that action definitions mention “primitive” predicates like `on`, and that all changes in truth value of “derived” predicates like `above` occur through axioms. Without axioms, the action definitions will have to describe changes in all predicates that might be affected by an action, which leads to a complex software engineering (or “domain engineering”) problem.

If a domain declares requirement `:true-negation` (which implies `:open-world`), then exactly how action definitions interact with axioms becomes hard to understand, and the management takes no responsibility for the outcome. (For example, if there is an axiom

$P \wedge Q \supset R$ , and an action causes (`not R`) when  $P$  and  $Q$  are true, does  $P$  become false or  $Q$ ?)

The domain requirement `:subgoal-through-axioms` indicates that a goal involving derived predicates may have to be solved by finding actions to change truth values of related primitive predicates. For example, a goal (`above A B`) might be achieved by either achieving (`on A B`) or achieving (`and (an A Z) (above Z B)`) for some  $Z$ . A domain that does not declare this requirement may still have axioms, but they will be used only for timeless predicates.

Note that a given predicate can be in the `:implies` field of more than one axiom.

## 10 Safety Constraints

A domain declaring requirement `:safety-constraints` is allowed to specify *safety constraints*, defined as background goals that must be satisfied throughout the planning process. A plan is allowed only if at its end none of these background goals is false. In other words, if one of the constraints is violated at some point in the plan, it must become true again by the end.

```
<safety-def> ::= (:safety <GD>)
```

For example, one could command a softbot (software robot) to avoid deleting files that are not backed up on tape with the following constraint:

```
(:safety
  (forall (?f)
    (or (file ?f) (written-to-tape ?f))))
```

As everywhere else in PDDL, free variables are not allowed.

It is important to note that safety constraints do *not* require an agent to *make* them true; rather, the agent must avoid creating *new* violations of the constraints. For example, if a constraint specifies that all of my files be read protected, then the agent would avoid changing any of my files to be readable; but if my `.plan` file is already readable in the initial state, then the agent would not protect that file.

For details of safety constraints, please refer to [11].

Safety constraints should not be confused with `:timeless` propositions. (See Section 4.) Timeless propositions are always true in all problems in the domain, and it should be impossible for any action to change them. Hence no special measures are required to ensure that they are not violated.

## 11 Adding Axioms and Action Expansions Modularly

Although PDDL allows a domain to be defined as one gigantic `define`, it is often more convenient to break the definition into pieces. The following notation allows adding axioms and action expansions to an existing domain:

```

(define (addendum <name>)
  (:domain <name>)
  <extra-def>*)
<extra-def>      ::= <action-def>
<extra-def>      ::= :domain-axioms <axiom-def>
<extra-def>      ::= :action-expansions <method-def>
<extra-def>      ::= :safety-constraints <safety-def>
<method-def>     ::= (:method <action functor>
                      [ :name <name> ]
                      :parameters ( <typed list (variable)> )
                      <action-def body>

```

Please remember that, as explained in Section 4, in the “strict subset” of PDDL addenda are not allowed.

Inside a `(define (addendum ...) ...)` expression, `:actions` and `:axioms` behave as though they had been included in the original `(define (domain ...) ...)` expression for the domain. `:method` declarations specify further choice points for the expansion of an already-declared action, almost as though the given `<action-def body>` included inside a `choice` in the original expansion of the action. (It doesn’t work quite that neatly because the parameters may have new names, and because an `<action-def body>` is not exactly what’s expected in a `choice`.)

In a method definition, the `<action-def body>` may not have an `:effect` field or an `:only-in-expansions` field.

Method names are an aid in describing problem solutions as structures of instantiated action schemas. Each action has its own space of method names; there is no need to make them unique over a domain. If an action has a method supplied in its original definition, the name of that method is the same as the name of the action itself.

Example:

```

(define (addendum carry-methods)
  :domain translog
  ...
  (:method CARRY-VIA-HUB
    :name usual
    :parameters (?p - package ?tc ?tc - tcenter)
    :expansion (forsome (?hub - hub)
      (in-context (series (carry-direct ?p ?tc1 ?hub)
                          (carry-direct ?p ?hub ?tc2))
        :precondition (exists (?city1 ?city2 - city
                              ?reg1 ?reg2 - region)
          (and (in-city ?tc1 ?city1)
               (in-city ?tc2 ?city2)
               (in-region ?city1 ?reg1)
               (in-region ?city2 ?reg2)
               (serves ?hub ?reg1)

```



```

(serve ?hub ?reg2)
(available ?hub))))))



```

The reason to give addenda names is so the system will know when an addendum is being redefined instead of being added for the first time. When a `(define (addendum N) ...)` expression is evaluated, all the material previously associated with *N* is erased before the definitions are added. The name of an addendum is local to its domain, so different domains can have addenda with the same name.

## 12 Expression Evaluation

If a domain declares requirement `:expression-evaluation`, then it supports a built-in predicate `(eval E V)` that succeeds if the value of expression *E* is *V*. *E* has Lisp-like syntax for expressions, which should at least allow functions `+`, `-`, `*`, and `/`; this argument position is said to be an *evaluation context*. Evaluation contexts are the only places in PDDL where functions are allowed, except for terms denoting actions. *E* should not include any variables; if it does, the goal will fail in an implementation-dependent way. (Some implementations will distinguish between failure due to *E*'s value being different from *V* and failure due to the inability to generate all instances of *E*. Cf. `equation`, below.)

Another evaluation context is the argument to `(test E)`. Here *E* is an expression whose main functor is one of `=`, `>`, `<`, `>=`, or `<=`. The expression is evaluated, and the goal succeeds if it evaluates to `T`.

The goal `(bounded-int I L H)` succeeds if *I* is an integer in the interval [*L*, *H*]. *L* and *H* are evaluation contexts.

The goal `(equation L R)` tries to bind variables so that *L* and *R* are equal. Both *L* and *R* are evaluation contexts, but if there is an unbound variable, it is bound to whatever value would make *L* and *R* evaluate to the same thing. E.g., if `?y` has been bound to 6, and `?x` is unbound, then `(equation (+ ?x 2) (- ?y 3))` will bind `?x` to 1. Don't expect an implementation to do anything fancy here; every implementation should at least handle the case where there is a single occurrence of an unbound variable, buried at most inside an expression of the form `(+ ...)`.

The domain-vars defined in `(define (domain...) ...)` expressions are evaluated in evaluation contexts. The syntax is

```

<domain-vars-def> ::= (:domain-variables
                        <typed list(domain-var-declaration)>
  <domain-var-declaration>:= <name> | (<name> <constant>)
```

E.g.:

```

(define (domain cat-in-the-hat)
  (:types thing)
  (:domain-variables (numthings 2) - integer)
```

```

...
(:axiom
  :vars (?i - integer)
  :context (bounded-int ?i 1 numthings)
  :implies (thing ?i)))

```

A variable like this is scoped over the entire domain, and is inherited by domains that extend this one. If the variable is redeclared in an extending theory, it shadows the original binding.

If a domain declares requirement `:fluents`, then it supports the type `(fluent <type>)`, plus some new predicates. A fluent is a term with time-varying value (i.e., a value that can change as a result of performing an action). The proposition `(current-value  $F$   $V$ )` is true in a situation if  $V$  is the current value of  $F$  in that situation. Further, if a planner handles the `:fluents` requirement, then there must be a built-in predicate `(fluent-eval  $E$   $V$ )`, which succeeds if  $V$  is the value of  $E$ , using the current value of any fluent that occurs in  $E$  (and otherwise behaving like `eval`). Similarly, there is a predicate `fluent-test` that is to `test` as `fluent-eval` is to `eval`. In addition, there is an effect `(change  $F$   $E$ )` that changes the value of fluent  $F$  to  $E$ .  $E$  is an evaluation context, and its value is computed with respect to the situation obtaining before the action (cf. `when`).

```

(:action pour
  :parameters (?source ?dest - container)
  :vars (?sfl ?dfl - (fluent number) ?dcap - number)
  :precondition (and (contents ?source ?sfl)
                     (contents ?dest ?dfl)
                     (capacity ?dest ?dcap)
                     (fluent-test (<= (+ ?sfl ?dfl) ?dcap)))
  :effect (when (and (contents ?source ?sfl)
                    (contents ?dest ?dfl))
            (and (change ?sfl 0)
                 (change ?dfl (+ ?dfl ?sfl)))))

```

One of the additional built-in functions that comes with requirement `:fluents` is `(sum  $v$   $p$   $e$ )`. This is a fluent whose value in a situation is

$$\sum_{\theta \text{ such that } \theta(p) \text{ is true}} \theta(e)$$

$v$  declares all the variables of  $p$  that aren't already bound.  $e$  is a fluent-evaluation context. For example,

```

(fluent-eval (sum (?p - person ?w - number)
  (and (aboard ?p ?elevator)
        (weight ?p ?w))
  ?w))

```

succeeds if  $?w$  is the total weight of all the people on a  $?elevator$  (a variable which must be bound somewhere else). Note that the value of this fluent depends on who is on the

elevator, not on what their mass is, because in this formulation it's assumed not to change. If dieting is to be taken into account, then we would write

```
(fluent-eval (sum (?p - person ?w - (fluent number))
                (and (aboard ?p ?elevator)
                     (weight ?p ?w))
              ?w))
```

where now ?w is a fluent itself.

## 13 Problems

A problem is what a planner tries to solve. It is defined with respect to a domain. A problem specifies two things: an initial situation, and a goal to be achieved. Because many problems may share an initial situation, there is a facility for defining named initial situations.

```
<problem>          ::= (define (problem <name>)
                        (:domain <name>)
                        [<require-def>]
                        [<situation> ]
                        [<object declaration> ]
                        [<init>]
                        <goal>+
                        [<length-spec> ])

<situation>         ::= (:situation <initsit name>)
<object declaration> ::= (:objects <typed list (name)> )
<init>              ::= (:init <literal(name)>+ )
<initsit name>      ::= <name>
<goal>              ::= (:goal <GD>)
<goal>              ::= :action-expansions
                        (:expansion <action spec(action-term)> )
<length-spec>       ::= (:length [(:serial <integer>)] [(:parallel <integer>)])
```

Initial situations are defined thus:

```
<initsit def> ::= (define (situation <initsit name>)
                  (:domain <name>)
                  [ <object declaration> ]
                  [ <init> ])
```

A **problem** definition must specify either an initial situation by name, or a list of initially true literals, or both. If it specifies both, then the literals are treated as effects (adds and deletes) to the named situation. The **<initsit name>** must be a name defined either by a prior **situation** definition or a prior **problem** definition. The **:objects** field, if present, describes objects that exist in this problem or initial situation but are not declared in the **:constants** field of its domain or any superdomain. Objects do not need to be declared if they occur in the **:init** list in a way that makes their type unambiguous.

All predicates which are not explicitly said to be true in the initial conditions are assumed by PDDL to be false, unless the domain declares requirement `:open-world`.

For example,

```
(define (situation briefcase-init)
  (:domain briefcase-world)
  (:objects P D)
  (:init (place home) (place office)))

(define (problem get-paid)
  (:domain briefcase-world)
  (:situation briefcase-init)
  (:init (at B home) (at P home) (at D home) (in P))
  (:goal (and (at B office) (at D office) (at P home))))
```

The `:goal` of a problem definition may include a goal description or (if the domain has declare the requirement `:action-expansions`) an expansion, or both. A solution to a problem is a series of actions such that (a) the action sequence is feasible starting in the given initial situation situation; (b) the `:goal`, if any, is true in the situation resulting from executing the action sequence; (c) the `:expansion`, if any, is satisfied by the series of actions (in the sense explained in Appendix A).

For instance, in the transportation domain, one might have the problem

```
(define (problem transport-beans)
  (:domain transport)
  (:situation standard-network)
  (:init (beans beans27)
        (at beans27 chicago))
  (:expansion (constrained (tag (carry-in-train
                                beans27 chicago newyork)
                              (> end))
                    (in-context end
                      :precondition (not (spoiled beans27))))))
```

The `:requirements` field of a problem definition is for the rare case in which the goal or initial conditions specified in a problem require some kind of expressiveness that is not found in the problem's domain.

The `:length` field of a problem definition declares that there is known to be a solution of a given length; this may be useful to planners that look for solutions by length.

Unlike addendum names (see Section 11), problem names are global. Exactly how they are passed to a planner is implementation-dependent.

## 14 Scope of Names

Here is a table showing the different kinds of names and over what scope they are bound

| <i>Name type</i> | <i>Scope</i>       |
|------------------|--------------------|
| Reserved word    | PDDL language      |
| Domain name      | Global             |
| Type             | Domain, inherited  |
| Constant         | Domain, inherited  |
| Domain variable  | Domain, inherited  |
| Predicate        | Domain, inherited  |
| Action functor   | Domain, inherited  |
| Addendum         | Domain, local      |
| Situation name   | Domain, inherited  |
| Problem name     | Global             |
| Method name      | Per action functor |

Names with scope “domain, inherited” are visible in a domain and all its descendants. Names with scope “domain, local” are visible within a domain but are not visible in descendant domains. Method names are a documentation convenience, and need have no scope except that of the functor of which they are methods.

There is limited possibility of overloading names in PDDL. The same name may be used for a global-scope entity (e.g., a problem) and a domain-scope entity (e.g., a predicate). But the same domain-scoped name cannot be used for two different kinds of entity. For instance, the same name cannot be used for a type and an action.

The rules for method names are looser, because they are not true names. The only restriction is that two distinct methods for the same action may not have the same name.

## 15 Current Requirement Flags

Here is a table of all requirements in PDDL 0.0. Some requirements imply others; some are abbreviations for common sets of requirements. If a domain stipulates no requirements, it is assumed to declare a requirement for `:strips`.

| <i>Requirement</i>                      | <i>Description</i>                                                                                                                                                                           |
|-----------------------------------------|----------------------------------------------------------------------------------------------------------------------------------------------------------------------------------------------|
| <code>:strips</code>                    | Basic STRIPS-style adds and deletes                                                                                                                                                          |
| <code>:typing</code>                    | Allow type names in declarations of variables                                                                                                                                                |
| <code>:disjunctive-preconditions</code> | Allow <code>or</code> in goal descriptions                                                                                                                                                   |
| <code>:equality</code>                  | Support <code>=</code> as built-in predicate                                                                                                                                                 |
| <code>:existential-preconditions</code> | Allow <code>exists</code> in goal descriptions                                                                                                                                               |
| <code>:universal-preconditions</code>   | Allow <code>forall</code> in goal descriptions                                                                                                                                               |
| <code>:quantified-preconditions</code>  | <code>= :existential-preconditions</code><br><code>+ :universal-preconditions</code>                                                                                                         |
| <code>:conditional-effects</code>       | Allow <code>when</code> in action effects                                                                                                                                                    |
| <code>:action-expansions</code>         | Allow actions to have <code>:expansions</code>                                                                                                                                               |
| <code>:foreach-expansions</code>        | Allow actions expansions to use <code>foreach</code><br>(implies <code>:action-expansions</code> )                                                                                           |
| <code>:dag-expansions</code>            | Allow labeled subactions<br>(implies <code>:action-expansions</code> )                                                                                                                       |
| <code>:domain-axioms</code>             | Allow domains to have <code>:axioms</code>                                                                                                                                                   |
| <code>:subgoal-through-axioms</code>    | Given axioms $p \supset q$ and goal $q$ , generate subgoal $p$                                                                                                                               |
| <code>:safety-constraints</code>        | Allow <code>:safety</code> conditions for a domain                                                                                                                                           |
| <code>:expression-evaluation</code>     | Support <code>eval</code> predicate in axioms<br>(implies <code>:domain-axioms</code> )                                                                                                      |
| <code>:fluents</code>                   | Support type (fluent $t$ ).<br>Implies <code>:expression-evaluation</code>                                                                                                                   |
| <code>:open-world</code>                | Don't make the "closed-world assumption" for all predicates — i.e., if an atomic formula is not known to be true, it is not necessarily assumed false                                        |
| <code>:true-negation</code>             | Don't handle <code>not</code> using negation as failure, but treat it as in first-order logic<br>(implies <code>:open-world</code> )                                                         |
| <code>:adl</code>                       | <code>= :strips + :typing</code><br><code>+ :disjunctive-preconditions</code><br><code>+ :equality</code><br><code>+ :quantified-preconditions</code><br><code>+ :conditional-effects</code> |
| <code>:ucpop</code>                     | <code>= :adl + :domain-axioms</code><br><code>+ :safety-constraints</code>                                                                                                                   |

## 16 The Syntax Checker

This section describes how to run the PDDL syntax checker once you have downloaded the tar distribution file.

The file `pddl.system` contains a Kantrowitz-defsystem definition of `pddl-syntax-check` and `pddl-solution-check`, which are the syntax checker and solution checker, respectively. Adjust the directory names in the calls to `MK:DEFSYSTEM`, then load in `pddl.system`, and do

```
(MK:COMPILE-SYSTEM 'PDDL-SYNTAX-CHECK)
```

If you compile and load a file full of PDDL definitions, then the domain will be defined as you expect. However, this works only if the file contains no syntactic errors. To find and eliminate errors, use the function

```
(PDDL-FILE-SYNCHECK <file>)
```

This will create a new file with extension “.chk” which is a pretty-printed version of the input, with all syntactic errors flagged thus:

```
<< error-description:  thing>>
```

where ”thing” is a subexpression and ”error-description” says what’s wrong with it.

The idea is that the “.chk” file plays the role of the “.log” file in LaTeX. Instead of line numbers the system just prints the entire input with errors flagged. How well this works depends partly on the quality of the pretty-printer.

If the global variable `STRICT*` is set to `T`, the syntax checker will flag violations of “strictness” as defined in Section 4.

The syntax checker does a pretty thorough job, although there are a few gaps. In order to check for correct number of arguments to predicates and such, it’s necessary to store information about domains as they are checked, so we have gone all the way, and written the syntax checker in such a way that it stores all the information about a domain in various data structures, whether the checker itself needs the information or not. Hence a good way to implement a planner that uses the PDDL notation is to start with the internal data structures containing the information about a domain, and add whatever indexes the planner needs for efficiency.

To avoid collisions with users’ code, these data structures are not stored in any place that is visible by accident (such as symbol property lists). There is a global hash table `PDDL-SYMBOL-TABLE*` that contains all global bindings. Domains are stored in this table, and then symbols with domain scope are stored in binding tables associated with the domain.

## 17 The Solution Checker

The solution checker is another Lisp program. To compile and load it, follow the instructions for the syntax checker, but do `(MK:COMPILE-SYSTEM 'PDDL-SOLUTION-CHECK)` at the end.

A solution to a PDDL problem is a pair of items:

1. A primitive *action sequence*, i.e., a list of actions that have no expansions.
2. A list of nonprimitive actions, called *expansion hints*.

The second component may be absent. The first may, of course, be empty, but only if the problem is trivial.

Suppose problem  $P$  has initial situation  $S$ , `:goal`  $G$ , and `:expansion`  $E$ . A solution with action sequence  $A$  and hints  $H$  *solves*  $P$  if and only if all of the following are true:

1.  $A$  is feasible starting in situation  $S$ , and in the situation resulting from executing  $A$ ,  $G$  is true.

2.  $E$ , and, if present,  $H$  are executed by some (not necessarily contiguous) subsequence of  $A$ .
3. Every action in  $A$  that is declared `:only-in-expansions` occurs in one of the subsequences instantiating  $E$  or  $H$ .

To run the solution checker, first load the domain of the problem in (using `PDDL-FILE-SYNCHECK`), then call

(SOLUTION-CHECK  $A$   $H$   $P$ )

where  $A$  is the action sequence,  $H$  are the hints, and  $P$  is a problem (or problem name). It returns T if it can verify the solution, NIL if it can't. It may print some helpful messages as well.

As of Release 1.0, the solution checker does not actually check for the presence of action expansions. So the  $H$  argument is ignored.

If the problem definition occurs in a file by itself ( $pfile$ ), and a solution occurs in a file by itself ( $sfile$ ), then the procedure

(SOLUTION-FILE-CHECK  $sfile$   $pfile$ )

will read the files, define the problem, and run `SOLUTION-CHECK` on the solution in  $sfile$ , which must be in the form

```
(step1
 step2
 ...
 stepk)
```

## A Formal Definition of Action Expansions

An *anchored action sequence* is a sequence  $\langle S_0, q_1, \dots, q_k \rangle$ , where  $S_0$  is a situation,  $q_1, \dots, q_k$  are ground action terms, and  $q_{i+1}$  is feasible in the situation resulting from executing  $q_1, \dots, q_i$  starting in  $S_0$ . We call this situation  $result_{dom}(S_0, \langle q_1, \dots, q_i \rangle)$ , and define it in the usual way. The subscript *dom* refers to the domain with respect to which *result* is defined. In what follows, we will abbreviate  $result_{dom}(S_0, \langle q_1, \dots, q_i \rangle)$  as  $S_i$ .

A *realization within domain dom* of an action spec  $A$  in the anchored action sequence  $\langle S_0, q_1, \dots, q_k \rangle$  is a mapping  $R$  whose domain is the set of ordered pairs  $\langle E, \sigma \rangle$ , where  $E$  is a subexpression of  $A$  (defined by position, so two different occurrences of the same expression count as different) or an action tag, and  $\sigma$  is a substitution; and whose range is a set of unions of closed intervals of the *real* interval  $[0, k]$ . (*Not* the integer interval!)

A realization  $R$  of  $A$  in  $\langle S_0, q_1, \dots, q_k \rangle$  *satisfies* subexpression  $E$  of  $A$  *with respect to* substitution  $\sigma$ , if and only if one of the following is true:

1.  $E$  is an action-label term.
2.  $E$  is an occurrence of the term  $(--)$ , and there is some  $i, 0 \leq i \leq k$  such that  $R(E, \sigma) = [i, i]$ .



3.  $E$  is a primitive action term other than  $(--)$ , and there is some  $i, 1 \leq i \leq k$  such that  $\sigma(E) = q_i$ , and  $R(E, \sigma) = [i - 1, i]$ .
4.  $E$  is a nonprimitive action term, with  $\sigma(E)$  variable-free, and there is an expansion  $A'$  in  $\text{dom}$  of  $\sigma(E)$  (that is, an **:expansion** from the **:action** defining  $E$  or a **:method** for  $E$ ), and a realization  $R'$  within  $\text{dom}$  of  $\sigma(E)$  in  $\langle S_0, q_1, \dots, q_k \rangle$ , such that  $R(E, \sigma) = R'(\sigma(E), \emptyset)$ .
5.  $E = (\text{series } E_1 \dots E_m)$ , and for all  $i, 1 \leq i \leq m - 1$ ,  $R$  satisfies  $E_i$  with respect to  $\sigma$ , and for all  $i, j, 1 \leq i < j \leq m$ , and for all  $x_i \in R(E_i, \sigma), x_j \in R(E_j, \sigma), x_i \leq x_j$ ; and  $R(E, \sigma) = \cup_{1 \leq i \leq m} R(E_i, \sigma)$ .
6.  $E = (\text{parallel } E_1 \dots E_m)$ , and for all  $1 \leq i, j \leq m$ ,  $R$  satisfies  $E_i$  with respect to  $\sigma$ ; and  $R(E, \sigma) = \cup_{1 \leq i \leq m} R(E_i, \sigma)$ .
7.  $E = (\text{in-context } E_1 \ a_1 \dots a_l)$ , and  $R$  satisfies  $E_1$  with respect to  $\sigma$ , with  $R(E, \sigma) = R(E_1, \sigma)$  and, for each  $a_i$ :
  - If  $a_i = \text{:precondition } C$ , then  $C$  is true in  $S_L$ .
  - If  $a_i = \text{:maintain } C$ , then  $C$  is true in  $S_s$  for all integer  $s \in [L, H]$ .

where  $L = \min(R(E_1, \sigma))$  and  $H = \max(R(E_1, \sigma))$ .

8.  $E = (\text{choice } E_1 \dots E_m)$ , and for some  $i, 1 \leq i \leq m$ ,  $R$  satisfies  $E_i$  with respect to  $\sigma$ , and  $R(E, \sigma) = R(E_i, \sigma)$ .
9.  $E = (\text{forsome } \text{vars } E_1)$ , and there is a substitution  $\sigma'$  extending  $\sigma$  by binding  $\text{vars}$ , such that  $R$  satisfies  $E_1$  with respect to  $\sigma'$ , and  $R(E, \sigma) = R(E_1, \sigma')$ .
10.  $E = (\text{foreach } \text{vars } P \ E_1)$ , and there is a set  $X$  of extensions to  $\sigma$  such that for all  $\sigma' \in X$ ,  $\sigma'(P)$  is ground, such that if  $[L, H] = R(E, \sigma)$ , then

$$L = \cup_{1 \leq i \leq m} R(E_i, \sigma')$$

and

$$X = \{ \sigma' : \sigma' \text{ extends } \sigma \text{ by binding vars to make } \sigma'(P) \text{ ground and true in } S_L \}$$

11.  $E = (\text{tag } l_1 \dots l_l \ E_1 \ l_{l+1} \dots l_m)$ , and  $R$  satisfies  $E_1$  with respect to  $\sigma$ , with  $R(E, \sigma) = R(E_1, \sigma)$ , and for all  $i, 1 \leq i \leq m$ ,
  - If  $l_i = (< \ l)$ , then  $R(l, \sigma) = [L, L]$ .
  - If  $l_i = (> \ l)$ , then  $R(l, \sigma) = [H, H]$ .
  - Otherwise,  $R(l, \sigma) = [L, H]$ .

where  $L = \min(R(E_1, \sigma))$  and  $H = \max(R(E_1, \sigma))$ .

12.  $E = (\text{constrained } E_0 \ E_1 \dots E_m)$ , and for all  $i, 0 \leq i \leq m$ ,  $R$  satisfies  $E_i$  with respect to  $\sigma$  and  $R(E_i, \sigma) \subseteq R(E_0, \sigma)$ ; and  $R(E, \sigma) = R(E_0, \sigma)$ .

If  $R(E, \sigma)$  is not given a value by repeated application of the rules in the list, then  $R(E, \sigma) = \emptyset$ .

Finally, an anchored action sequence *satisfies* an action spec if the action spec has a realization into the action sequence that satisfies the entire action spec.

Note that the formal definition makes  $R(E, \sigma) = \emptyset$  if there is no occurrence of  $E$  inside a **foreach** or **forsome** yielding substitution  $\sigma$ , or if no action corresponding to  $E$  occurs in the action sequence. Hence if an action spec has references to tags from contexts that make no sense, they will be interpreted as the empty set, and be ignored if used in constraints. (Implementators may not want to implement these semantics.)

## References

- [1] Scott Andrews, Brian Kettler, Kutluhan Erol, and James Hendler. Um Translog: A Planning Domain for the Development and Benchmarking of Planning Systems. 1995.
- [2] A. Barrett, D. Christianson, M. Friedman, K. Golden, C. Kwok, J.S. Penberthy, Y. Sun, and D. Weld. UCPOP user’s manual, (version 4.0). Technical Report 93-09-06d, University of Washington, Department of Computer Science and Engineering, November 1995. Available via FTP from `pub/ai/` at `ftp.cs.washington.edu`.
- [3] Jim Blythe, Oren Etzioni, Yolanda Gil, Robert Joseph, Dan Kahn, Craig Knoblock, Steven Minton, Alicia Pérez, Scott Reilly, Manuela Veloso, and Xuemei Wang. Prodigy 4.0: The manual and tutorial. Technical Report CMU-CS-92-150, Carnegie Mellon University, 1992.
- [4] K. L. Clark. Negation as failure. In H. Gallaire and J. Minker, editors, *Logic and Data Bases*, pages 293–322. Plenum Publishing Corporation, New York, NY, 1978.
- [5] K. Currie and A. Tate. O-Plan: the open planning architecture. *Artificial Intelligence*, 52(1):49–86, November 1991.
- [6] K. Erol, J. Hendler, and D. Nau. UMCP: A sound and complete procedure for hierarchical task-network planning. In *Proc. 2nd Intl. Conf. on AI Planning Systems*, pages 249–254, June 1994.
- [7] Drew McDermott. Revised Nisp Manual. Technical Report 642, Yale Computer Science Department, 1988.
- [8] Drew McDermott. A Heuristic Estimator for Means-ends Analysis in Planning. In *Proc. International Conference on AI Planning Systems* **3**, pages 142–149, 1996.
- [9] E. Pednault. Synthesizing plans that contain actions with context-dependent effects. *Computational Intelligence*, 4(4):356–372, 1988.
- [10] E. Pednault. ADL: Exploring the middle ground between STRIPS and the situation calculus. In *Proc. 1st Int. Conf. on Principles of Knowledge Representation and Reasoning*, pages 324–332, 1989.
- [11] Dan Weld and Oren Etzioni. The first law of robotics (a call to arms). In *Proc. 12th Nat. Conf. on AI*, pages 1042–1047, 1994.
- [12] David Wilkins. *Practical Planning: Extending the Classical AI Planning Paradigm*. Morgan Kaufmann Publishers, Inc, 1988.
